# Supplementary material
Source: PubMed Central journal article supplement (PMC6255162)

*Supporting Information:*

*Materials and Methods:*

**Neonatal foreskin keratinocytes, transfection, raft cultures and analysis:** Primary human keratinocytes were isolated from neonatal foreskins that were collected per approved IRB protocol from the Newborn Nursery of the University of Alabama at Birmingham. Early passage (P0 or P1) PHKs were transfected with pNeo-Lox-HPV18 and pCAGGS-nlsCre, a plasmid that expresses nls-Cre recombinase, using Fugene 6.0 (Promega) and selected with G418 (110  $\mu\text{g/ml}$  for 3 days) as described (1). Multiple raft cultures from each batch of transfected PHKs were prepared. Independent experiments used different batches of PHKs harvested on different days. Vorinostat was dissolved in DMSO as a concentrated stock (10 mM). A subset of cultures were treated with Vorinostat (Cat. V8477, LC Labs, Wuburn, MA, USA) at different concentrations. Unless otherwise specified, cultures were exposed to Vorinostat from day 6 through day 13 and harvested on day 13. Culture media with or without Vorinostat were refreshed every other day until harvest. The control cultures were untreated or exposed to DMSO (0.1 %) for the same duration. This vehicle did not affect cell proliferation or differentiation, nor HPV DNA amplification. 5-Bromo-2'-deoxyuridine (BrdU, cat. B5002, Millipore Sigma, St. Louis, MO, USA), an analogue of thymidine, was added to the culture medium at 100  $\mu\text{g/ml}$  for the final 6 h prior to harvesting. One of the cultures at each condition was harvested by fixation in 10% buffered formalin, embedded in paraffin (FFPE) and used for in situ analyses. Another set of cultures was harvested for total DNA to determine the relative viral DNA amplification. The remaining unfixed cultures were used to isolate total proteins in MCLB buffer for immunoblot analyses (2). Belinostat (Cat. S1085) and Panobinostat

(Cat. S1030) were procured from Selleckchem (Houston, TX, USA). Raft cultures were treated at a range of concentrations from day 6 to day 14 and harvested on day 14.

W12-E cells were grown as described (3) and used to prepare raft cultures. Cultures were harvested on day 14 with or without exposure to Vorinostat at 1 and 5  $\mu$ M from day 6 to day 14. The Moloney murine leukemia retroviral vector expressing HPV-11 E7 G22D mutant form and the preparation of raft cultures of PHKs infected with amphotropic recombinant retrovirus have been described (4). Cultures were harvested on day 14, with or without an exposure to Vorinostat as described above. BrdU was added to these two raft cultures as described above. Cervical cancer cell line, CaSki, (5) were grown in DMEM supplemented with 10% fetal bovine serum. Raft cultures were similarly prepared with or with exposure to Vorinostat from day 5 to day 14 and harvested on Day 14.

### **Histology and indirect immunofluorescence (IF) assays**

Freshly cut 4  $\mu$ m tissue sections of FFPE raft cultures were deparaffinized and rehydrated and stained with hematoxylin and eosin (H&E) (Fisher Scientific). For additional in situ assays, rehydrated sections were heat treated for antigen retrieval in 10 mM citrate buffer (pH 6.0 in microwave) as per standard protocols. Tissues were then treated with 3% hydrogen peroxide for 10 minutes and then blocked with 10% goat serum for 1 h. The sections were probed with primary antibodies ([SI Appendix, Table 1](#)). Indirect immunofluorescence (IF) signals were detected via HRP-conjugated or fluorescently labeled secondary antibodies. HRP-conjugated secondary antibodies were labeled with fluorescein or cy3 by the tyramide-based signal amplification and detection system (Perkin-Elmer, MA, USA) as described (6). Tissue sections were mounted with 4',6-

diamidino-2-phenylindole (DAPI) containing mounting media (H1200, Vector Laboratories, Burlingame, CA). Images were captured with a 20x objective in an Olympus BX63 microscope fitted with appropriate filters for immunofluorescence using an Olympus DP73 camera and cellSens software. Numbers of total nuclei and those positive for specific antigens as well as signal intensity were determined from four non-overlapping areas of each slide using the Count and Measure application of the cellSens software. The same threshold level of signal intensity was set to count objects in each set of experiments. Images were processed using Adobe Photoshop software.

### **In-situ hybridization and qPCR**

Fluorescence in-situ hybridization to detect HPV-18 DNA amplification in FFPE tissue sections was performed as reported (6). Real time quantitative PCR to determine the relative HPV-18 plasmid DNA copy number/cell was conducted as described (1, 7). The average values from triplicate qPCR reactions were used to compute DNA copy numbers per cell.

### **Immunoblot assays**

Total protein was prepared from raft cultures in the presence of protease and phosphatase inhibitors as described (8). Lysates were resolved in 4-15% polyacrylamide gels (Mini-Protean TGX Stain-Free, BIO-RAD, Hercules, California) and transferred to PVDF membranes by the standard wet blot transfer method. Target proteins were probed with specific primary antibodies and detected with appropriate horseradish peroxidase

(HRP)-conjugated secondary antibodies in combination with Pierce ECL substrate (Cat. 32106) from Thermo-Scientific (Rockford, IL). Alternatively, mouse and rabbit antibodies were detected with IRDye680RD anti-mouse (green) and IRDye800CW anti-rabbit (red) secondary antibodies and scanned using an LI-COR CLx documentation system. Antibodies, suppliers, and dilutions used in immunoblots are presented in [Supplemental Information Appendix, Table 1](#).

### **TUNEL assay**

In-situ Cell Death Detection Kit Fluorescein (Cat # 11684795910 Roche, marketed by Sigma-Aldrich, Saint Louis, MO) was used for Terminal deoxynucleotidyl Transferase (TdT) dUTP Nick-End Labeling (TUNEL) assay. Raft culture sections were processed as described, equilibrated in PBS, and incubated with the detection reagents for 1 hour at 37°C as per the kit protocols. The sections were then washed with 1X Phosphate buffered saline and transferred to microscope slides in DAPI-containing mounting media. Images were captured by immunofluorescence microscopy with a 20X objective.

### *Figure Legends:*

Fig. S1. Histology of PHK or day 13 HPV-18 raft cultures exposed to DMSO or 200 nM Vorinostat from day 6 to 13, revealed by hematoxylin and eosin staining. Images were captured with 20X objective.

Fig. S2. Day 14 raft cultures of PHKs acutely transduced with a recombinant retrovirus expressing HPV-11 E7 D22G. Cultures were exposed to 1 or 5  $\mu$ M Vorinostat from day

6 to day 14. BrdU was added to the medium in the last 6 hr. Top row, histology, revealed by hematoxylin and eosin staining. Middle row, BrdU incorporation. Lower row, in situ detection of  $\gamma$ -H2AX (red) and TUNEL (green). Nuclei were stained with DAPI. Images were captured with 20X objective.

Fig. S3. Day 14 HPV-18 infected raft cultures exposed to Vorinostat, Belinostat or Panobinostat. (A) Histology was revealed by hematoxylin and eosin staining. (B) L1 antibody staining (green) of Balinostat and Panobinostat treated cultures. Images were captured with 20X objective.

Fig. S4. Double-stranded DNA damage and apoptosis in Belinostat and Panobinostat treated, HPV-18 infected raft cultures.  $\gamma$ -H2AX (red) and TUNEL signals (green) were revealed by indirect immunofluorescence detection. Nuclei were stained with DAPI. Images were captured with 20X objective.

#### References:

1. Wang HK, Duffy AA, Broker TR, & Chow LT (2009) Robust production and passaging of infectious HPV in squamous epithelium of primary human keratinocytes. *Genes Dev.* 23(2):181-194.
2. Genovese NJ, Banerjee NS, Broker TR, & Chow LT (2008) Casein kinase II motif-dependent phosphorylation of human papillomavirus E7 protein promotes p130 degradation and S-phase induction in differentiated human keratinocytes. *J. Virol.* 82(10):4862-4873.
3. Jeon S, Allen-Hoffmann BL, & Lambert PF (1995) Integration of human papillomavirus type 16 into the human genome correlates with a selective growth advantage of cells. *J. Virol.* 69(5):2989-2997.
4. Genovese NJ, Broker TR, & Chow LT (2011) Nonconserved lysine residues attenuate the biological function of the low-risk human papillomavirus E7 protein. *J. Virol.* 85(11):5546-5554.
5. Baker CC, *et al.* (1987) Structural and transcriptional analysis of human papillomavirus type 16 sequences in cervical carcinoma cell lines. *J. Virol.* 61(4):962-971.
6. Van Tine BA, Broker TR, & Chow LT (2005) Simultaneous in situ detection of RNA, DNA, and protein using tyramide-coupled immunofluorescence. *Methods Mol. Biol.* 292:215-230.
7. Banerjee NS, Wang HK, Beadle JR, Hostetler KY, & Chow LT (2017) Evaluation of ODE-Bn-PMEG, an acyclic nucleoside phosphonate prodrug, as an antiviral against productive HPV infection in 3D organotypic epithelial cultures. *Antiviral Res.* 150:164-173.

8. Banerjee NS, Wang HK, Broker TR, & Chow LT (2011) Human papillomavirus (HPV) E7 induces prolonged G2 following S phase reentry in differentiated human keratinocytes. *J. Biol. Chem.* 286(17):15473-15482.

**SI Appendix Table 1**

| <b>SI#</b> | <b>Antibody</b>                 | <b>Clone</b> | <b>Species</b> | <b>Vendor/Source</b>     | <b>Catalogue #</b> | <b>Application</b> |
|------------|---------------------------------|--------------|----------------|--------------------------|--------------------|--------------------|
| 1          | anti-ATM                        | D2E2         | Rabbit         | Cell Signaling           | 2873               | WB                 |
| 2          | anti-Phospho-ATM (S1981)        | EP1890Y      | Rabbit         | AbCam                    | ab81292            | WB                 |
| 3          | Apaf1                           | Clone 24     | Mouse, IgG1    | BD Biosciences           | 611364             | WB                 |
| 4          | Bim                             | C34C5        | Rabbit         | Cell Signaling           | 2933               | WB                 |
| 5          | Phospho-Histone g-H2AX (s139)   | Polyclonal   | Rabbit         | Cell Signaling           | 2577               | WB                 |
| 6          | Phospho-Histone g-H2AX          | 3F2          | Mouse, IgG1    | Abcam                    | ab22551            | IHC-P              |
| 7          | BAX                             | D2E11        | Rabbit         | Cell Signaling           | 5023               | WB                 |
| 8          | BrdU                            | ZBU30        | Mouse, IgG1    | Thermo Fisher Scientific | 03 3900            | IHC-P              |
| 9          | Cleaved caspase-3 (Asp175)      | 5A1E         | Rabbit         | Cell Signaling           | 9664               | WB                 |
| 10         | EZH2                            | Polyclonal   | Rabbit         | Millipore Sigma          | 07-689             | WB                 |
| 11         | pRB                             | G3-245       | Mouse, IgG1    | BD Biosciences           | 554136             | WB                 |
| 12         | RB-2/p130                       | Clone 10     | Mouse, IgG2a   | BD Biosciences           | 610261             | WB                 |
| 13         | p53                             | DO-7         | Mouse, IgG2b   | Leica Biosystems         | p53-DO7-L-CE       | WB, IHC            |
| 14         | PCNA                            | PC-10        | Mouse, IgG2a   | Invitrogen               | 180110             | IHC-P              |
| 15         | CycB1                           | Y106         | Rabbit         | AbCam                    | ab32053            | WB, IHC            |
| 16         | NOXA                            | Polyclonal   | Goat           | Santa Cruz Biotech       | sc-26917           | WB, IHC            |
| 17         | PUMA                            | EP512Y       | Rabbit         | AbCam                    | ab33906            | WB                 |
| 18         | HDAC1                           | Polyclonal   | Rabbit         | Bethyl Laboratories      | A300-713A          | WB                 |
| 19         | HDAC2                           | Polyclonal   | Rabbit         | Bethyl Laboratories      | A300-705A          | WB                 |
| 20         | HDAC3                           | 7G6C5        | Mouse, IgG2a   | Cell Signaling           | 3949               | WB                 |
| 21         | HDAC4                           | D15C3        | Rabbit         | Cell Signaling           | 7628               | WB                 |
| 22         | HDAC5                           | Polyclonal   | Rabbit         | Bethyl Laboratories      | A-303-463A         | WB                 |
| 23         | HDAC6                           | D2E5         | Rabbit         | Cell Signaling           | 7558               | WB                 |
| 24         | HDAC7                           | Polyclonal   | Rabbit         | Bethyl Laboratories      | A-301-384A         | WB                 |
| 25         | SirT1                           | D1D7         | Rabbit         | Cell Signaling           | 9475               | WB                 |
| 26         | Total DNA-PKcs                  | 3H6          | Mouse, IgG1    | Cell Signaling           | 12311              | WB                 |
| 27         | Phosphorylated DNA-PKcs (S2056) | Polyclonal   | Rabbit         | Abcam                    | ab18192            | WB                 |
| 28         | HPV-18 E6                       | G-7          | Mouse, IgG1    | Santa Cruz Biotech       | sc-365089          | WB                 |
| 29         | HPV-18 E7                       | F-7          | Mouuse, IgG1   | Santa Cruz Biotech       | sc-365035          | WB                 |
| 30         | E6AP                            | E-4          | Mouse, IgG2b   | Santa Cruz Biotech       | sc-166689          | WB                 |
| 31         | H4K12Ac                         | Polyclonal   | Rabbit         | Epigentek                | A-4029-050         | WB                 |
| 32         | H4K16 Ac                        | Polyclonal   | Goat           | Epigentek                | A-4030-050         | WB                 |

**SI Appendix , Table 1 (Continued)**

|    |                                 |            |             |                 |          |         |
|----|---------------------------------|------------|-------------|-----------------|----------|---------|
| 33 | Mre11                           | EPR3471    | Rabbit      | AbCam           | 109623   | WB      |
| 34 | Nbs1                            | Y112       | Rabbit      | AbCam           | 32074    | WB      |
| 35 | actin                           | AC-15      | Mouse, IgG1 | Millipore Sigma | A1978    | WB      |
| 36 | CK10                            | DE-K10     | Mouse, IgG1 | Abcam           | ab9026   | WB, IHC |
| 37 | Loricrin                        | Polyclonal | Rabbit      | AbCam           | ab85679  | IHC     |
| 38 | H4 (acetyl K5 + K8 + K12 + K16) | EPR16606   | Rabbit      | AbCam           | ab177790 | WB, IHC |
|    |                                 |            |             |                 |          |         |
|    |                                 |            |             |                 |          |         |
|    |                                 |            |             |                 |          |         |
|    |                                 |            |             |                 |          |         |



DMSO

200 nM Vorinostat

PHK

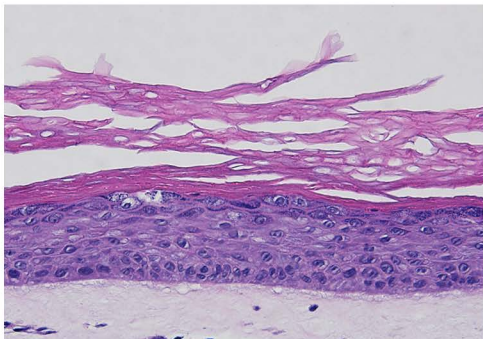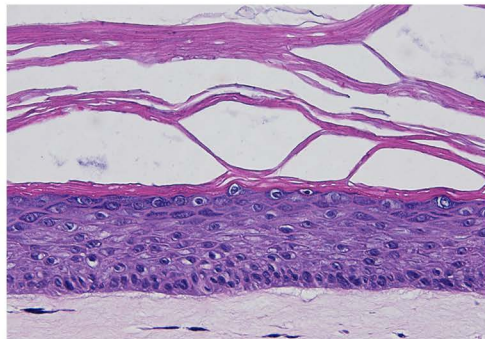

HPV-18

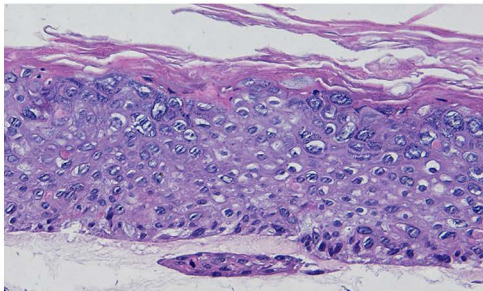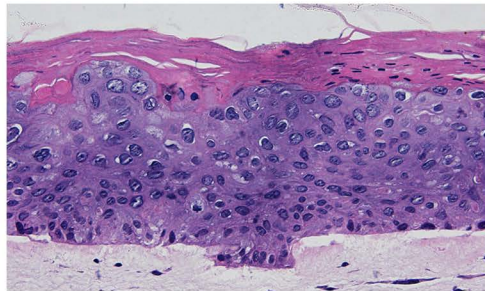

SI Fig. S2

DMSO

1  $\mu$ M Vorinostat

5  $\mu$ M Vorinostat

Histology

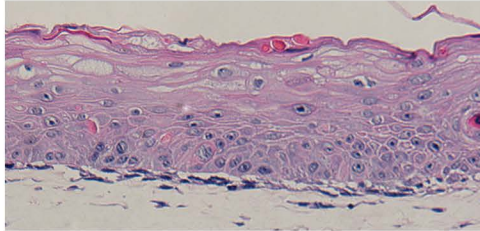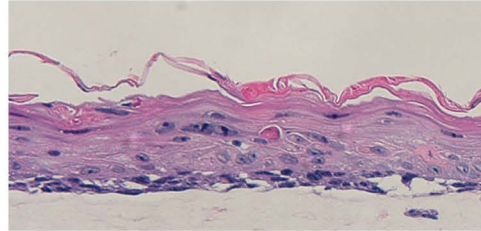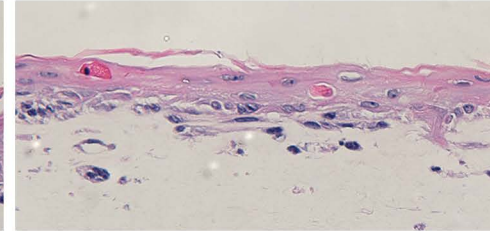

BrdU

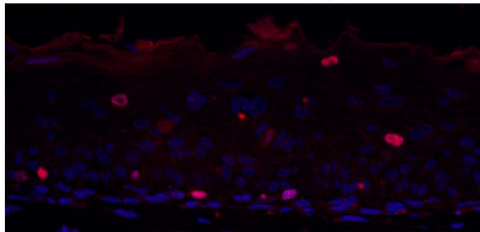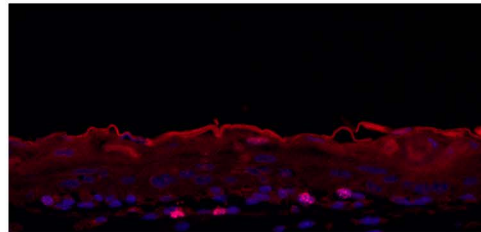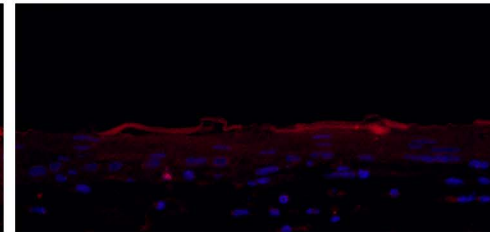

TUNEL  
 $\gamma$ -H2AX

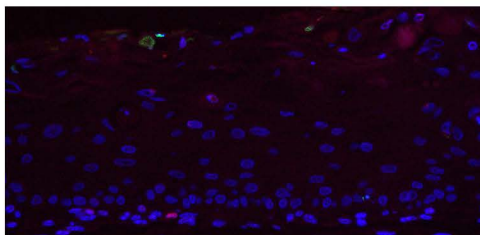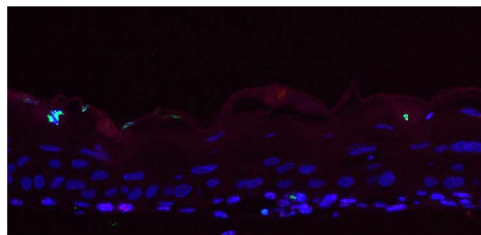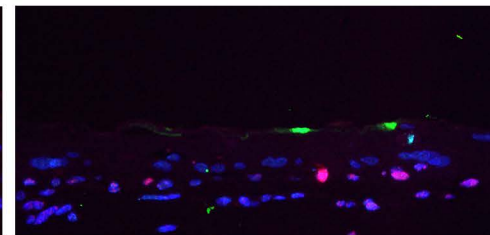

HPV-11 E7(G22D) Exposed to Agents From Days 6 to 14

SI Fig. S3

A.

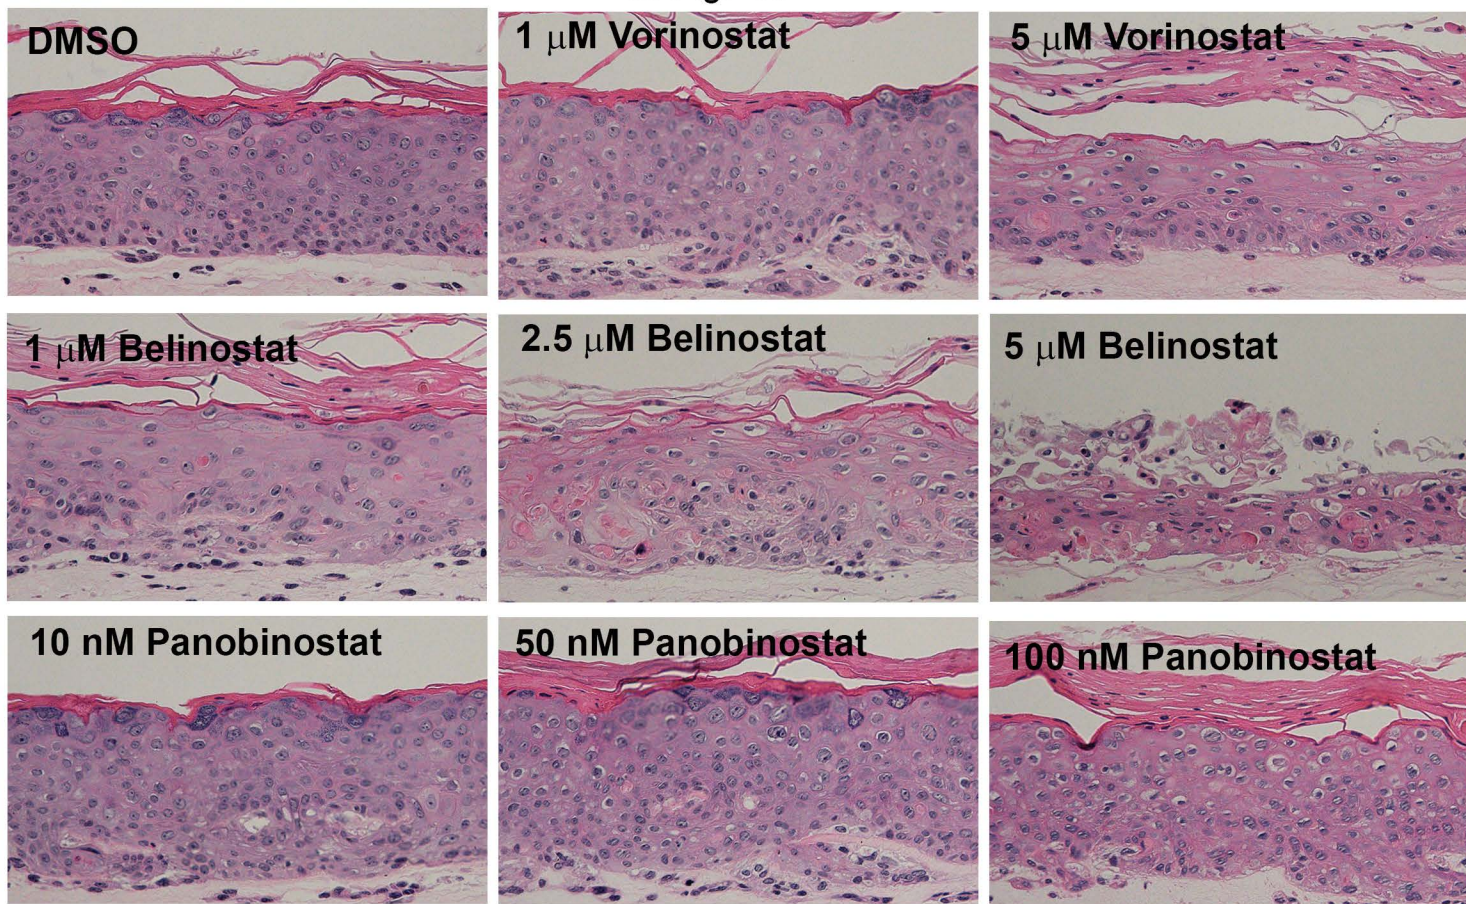

B.

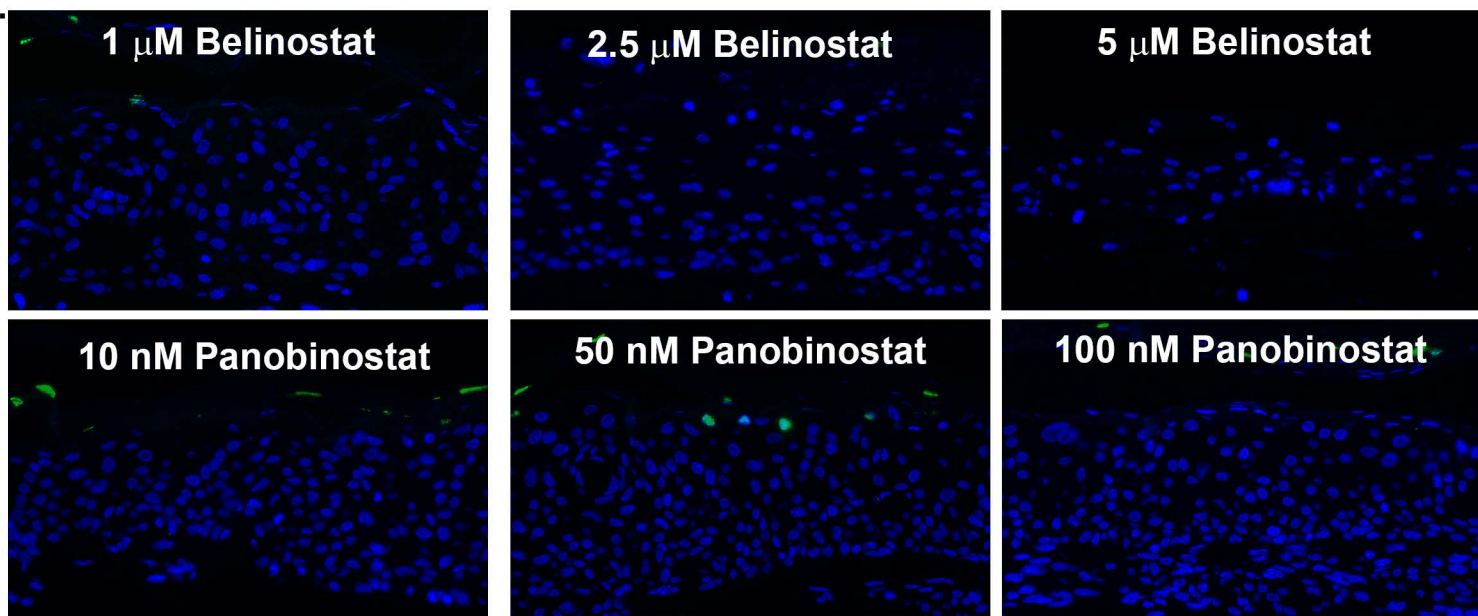

L1 DAPI

SI Fig. S4

1  $\mu$ M Belinostat

2.5  $\mu$ M Belinostat

5  $\mu$ M Belinostat

50 nM Panobinostat

250 nM Panobinostat

1  $\mu$ M Panobinostat

$\gamma$ -H2AX TUNEL DAPI

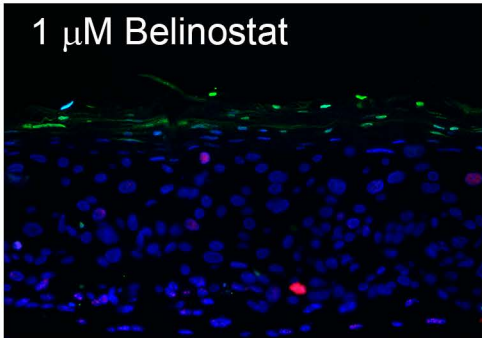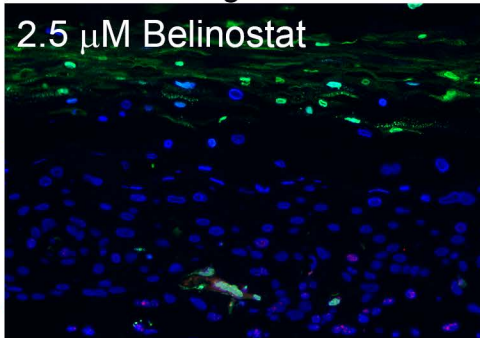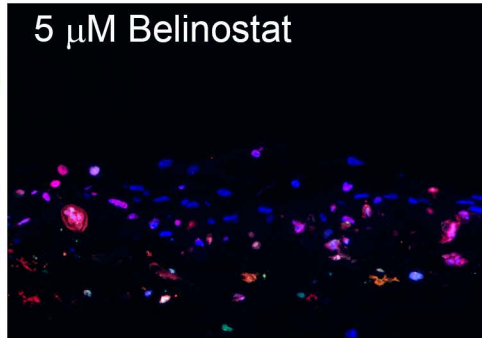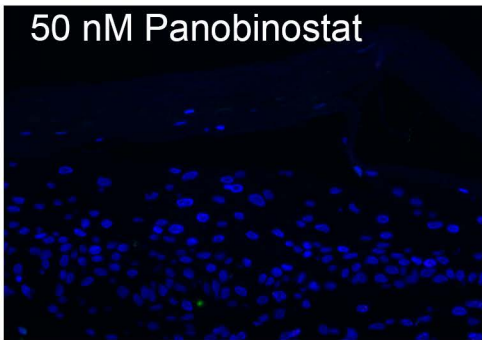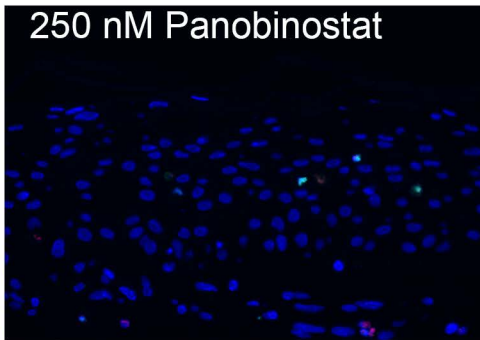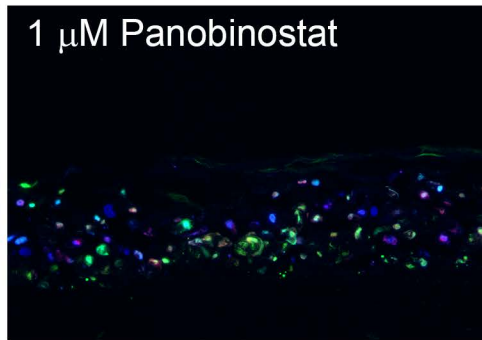

Supplement: pnas.1801156115.sapp.pdf [file pnas.1801156115.sapp.pdf]
